# Supplementary material for: Addressing Thalassaemia Management from Patients’ Perspectives: An International Collaborative Assessment
Source: MDPI journal article supplement (doi:10.3390/medicina60040650), 2024-04-18
Supplement: s1 [file s1]

## Supplementary Materials

### Section S1

In Section S1 we present the 36 countries included in the international healthcare management report and categorized into the five different continents (Europe, Middle East, Africa, Asia, America).

| Countries examined through international databases |                                |
|----------------------------------------------------|--------------------------------|
| A/A                                                | Country                        |
| Europe                                             |                                |
| 1.                                                 | Albania                        |
| 2.                                                 | North Macedonia                |
| Middle East                                        |                                |
| 3.                                                 | Bahrain                        |
| 4.                                                 | Jordan                         |
| 5.                                                 | Kuwait                         |
| 6.                                                 | Saudi Arabia                   |
| 7.                                                 | Lebanon                        |
| 8.                                                 | Oman                           |
| 9.                                                 | Palestine (West Bank and Gaza) |
| 10.                                                | United Arab Emirates           |
| Africa                                             |                                |
| 11.                                                | Algeria                        |
| 12.                                                | Egypt                          |
| 13.                                                | Mauritius                      |
| 14.                                                | Morocco                        |
| 15.                                                | Tunisia                        |
| Asia                                               |                                |
| 16.                                                | Azerbaijan                     |
| 17.                                                | Bangladesh                     |
| 18.                                                | Cambodia                       |
| 19.                                                | China                          |
| 20.                                                | India                          |
| 21.                                                | Indonesia                      |

|         |                   |
|---------|-------------------|
| 22.     | Iran              |
| 23.     | Iraq              |
| 24.     | Laos              |
| 25.     | Malaysia          |
| 26.     | Maldives          |
| 27.     | Myanmar           |
| 28.     | Nepal             |
| 29.     | Pakistan          |
| 30.     | Philippines       |
| 31.     | Sri Lanka         |
| 32.     | Thailand          |
| 33.     | Vietnam           |
| America |                   |
| 34.     | Argentina         |
| 35.     | Brazil            |
| 36.     | Trinidad & Tobago |

## Section S2

In Section S2 we provide the English version of the survey tool (questionnaire) used in the second phase of the International Collaborative Assessment Project (TIF's Global Survey).

|                                                                                                                                                     |
|-----------------------------------------------------------------------------------------------------------------------------------------------------|
| Original Questionnaire Text in English                                                                                                              |
| Thalassaemia Patient Questionnaire: Healthcare Coverage and Services for Thalassaemia Patients                                                      |
| Patients'/ Parents' views on the healthcare services they receive in their country                                                                  |
| About the Questionnaire                                                                                                                             |
| Section 1 – Profile                                                                                                                                 |
| This questionnaire should be answered by thalassaemia patients over 15 years old, or the parents of patients with thalassaemia under the age of 15. |
| Your answers will be used to support TIF's mission to lobby for safe and better quality treatment services for thalassaemia patients worldwide.     |
| Note: All information is anonymous and will be kept confidential at all times.                                                                      |
| 1. Please provide the following information:                                                                                                        |

|                                                                                                                                                                                                                                                                                                                                                                                                        |
|--------------------------------------------------------------------------------------------------------------------------------------------------------------------------------------------------------------------------------------------------------------------------------------------------------------------------------------------------------------------------------------------------------|
| <ul style="list-style-type: none"> <li>a. Age (in years):</li> <li>b. Country</li> <li>c. City</li> <li>d. Email</li> <li>e. Association</li> <li>f. The centre you are treated in</li> <li>g. Height (cm)</li> <li>h. Weight (kg)</li> </ul>                                                                                                                                                          |
| <p>2. I am (e.g., a patient; a parent; other-please specify):</p> <ul style="list-style-type: none"> <li>a. Patient</li> <li>b. Parent</li> </ul>                                                                                                                                                                                                                                                      |
| <p>3. What is your gender?</p> <ul style="list-style-type: none"> <li>a. Male</li> <li>b. Female</li> </ul>                                                                                                                                                                                                                                                                                            |
| <p>4. Which of the following categories best describes your employment status?</p> <ul style="list-style-type: none"> <li>a. Employed, working full-time</li> <li>b. Employed, working part-time</li> <li>c. Not employed, looking for work</li> <li>d. Not employed, NOT looking for work</li> <li>e. Retired</li> <li>f. Disabled, not able to work</li> </ul>                                       |
| <p>5. Which of the following best describes your current relationship status?</p> <ul style="list-style-type: none"> <li>a. Married</li> <li>b. Widowed</li> <li>c. Divorced</li> <li>d. Separated</li> <li>e. Cohabiting</li> <li>f. Single, never married</li> <li>g. Prefer not to answer</li> </ul>                                                                                                |
| <p>6. What is the highest level of school you have completed or the highest degree you have received?</p> <ul style="list-style-type: none"> <li>a. Less than high school degree</li> <li>b. High school degree or equivalent (e.g., GED)</li> <li>c. Some college but no degree</li> <li>d. Bachelor degree</li> <li>e. Master degree</li> <li>f. Doctoral degree</li> <li>g. Trade School</li> </ul> |
| Section 2 – Medical Information                                                                                                                                                                                                                                                                                                                                                                        |
| <p>7. If you are a patient, what is your diagnosis? If you are a parent, what is the diagnosis of your child?</p> <ul style="list-style-type: none"> <li>a. Beta Thalassaemia major</li> <li>b. Beta Thalassaemia intermedia</li> <li>c. HbH disease</li> <li>d. Other (please specify)</li> </ul>                                                                                                     |

|                                                                                                                                                                                                                                                                         |
|-------------------------------------------------------------------------------------------------------------------------------------------------------------------------------------------------------------------------------------------------------------------------|
| <p>8. At what age did you start transfusion therapy?</p> <ul style="list-style-type: none"> <li>a. 1-4 years old</li> <li>b. 4-6 years old</li> <li>c. 6-8 years old</li> <li>d. 8-10 years old</li> <li>e. Later</li> <li>f. I am not transfusion dependent</li> </ul> |
| <p>9. How is your current transfusion regime?</p> <ul style="list-style-type: none"> <li>a. I am not transfused</li> <li>b. I am regularly transfused</li> <li>c. I am occasionally transfused</li> </ul>                                                               |
| <p>10. If regularly transfused, what is the usual Hb level pre-transfusion?</p> <ul style="list-style-type: none"> <li>a. Less than 7mg/dl</li> <li>b. 7-8mg/dl</li> <li>c. 8-9mg/dl</li> <li>d. 9-10mg/dl</li> <li>e. 10-11mg/dl</li> <li>f. Over 11mg/dl</li> </ul>   |
| <p>11. Where do you receive your treatment at?</p> <ul style="list-style-type: none"> <li>a. Hospital/Clinic</li> <li>b. City</li> </ul>                                                                                                                                |
| <p>Section 3 - Quality of Services Received</p>                                                                                                                                                                                                                         |
| <p>Please answer the following questions to give us a clear indication of the quality of treatment you are receiving.</p>                                                                                                                                               |
| <p>12. Are blood supplies adequate at the centre you are transfused or are there delays in transfusion?</p> <ul style="list-style-type: none"> <li>a. No delays</li> <li>b. Occasional delays</li> <li>c. Delays are frequent so my Hb falls very low</li> </ul>        |
| <p>13. What kind of blood filtration is available at the clinic?</p> <ul style="list-style-type: none"> <li>a. Pre-storage</li> <li>b. Bedside</li> <li>c. None</li> <li>d. I don't know</li> </ul>                                                                     |
| <p>14. At what age did you start receiving iron chelation therapy?</p> <ul style="list-style-type: none"> <li>a. 1-4 years old</li> <li>b. 4-6 years old</li> <li>c. 6-8 years old</li> <li>d. 8-10 years old</li> <li>e. Later</li> </ul>                              |
| <p>15. What chelation drugs do you use?</p> <ul style="list-style-type: none"> <li>a. Desferrioxamine (Desferal)</li> <li>b. Deferiprone (Ferriprox / L1)</li> </ul>                                                                                                    |

|                                                                                                                                                                                                                                                                                                                                                                                                                                                                               |
|-------------------------------------------------------------------------------------------------------------------------------------------------------------------------------------------------------------------------------------------------------------------------------------------------------------------------------------------------------------------------------------------------------------------------------------------------------------------------------|
| <ul style="list-style-type: none"> <li>c. Deferasirox (Exjade)</li> <li>d. Combination</li> </ul>                                                                                                                                                                                                                                                                                                                                                                             |
| <p>16. How often do you receive chelation?</p> <ul style="list-style-type: none"> <li>a. I take it regularly as prescribed</li> <li>b. I do not take it regularly</li> <li>c. I don't receive iron chelation therapy</li> </ul>                                                                                                                                                                                                                                               |
| <p>17. How available are iron chelation drugs to you and at what dose?</p> <ul style="list-style-type: none"> <li>a. I always receive the chelation drugs in the quantity that I need them (at the right dose, continuous availability)</li> <li>b. I receive a lower dose of chelation drugs than prescribed because of there isn't enough quantity (poor supplies)</li> <li>c. I receive chelation drugs but not all the time because of interruptions in supply</li> </ul> |
| <p>18. How often is your ferritin level measured?</p> <ul style="list-style-type: none"> <li>a. Every month</li> <li>b. Every two months</li> <li>c. Every three months</li> <li>d. Every six months</li> <li>e. Every twelve months</li> <li>f. Never</li> </ul>                                                                                                                                                                                                             |
| <p>19. Your current ferritin level is:</p> <ul style="list-style-type: none"> <li>a. &lt;500ng/ml</li> <li>b. 500-1000ng/ml</li> <li>c. 1000-2000ng/ml</li> <li>d. 2000-4000ng/ml</li> <li>e. &gt;4000ng/ml</li> <li>f. I don't know</li> </ul>                                                                                                                                                                                                                               |
| <p>20. How often is cardiac iron measured by T2*?</p> <ul style="list-style-type: none"> <li>a. Twice a year</li> <li>b. Annually/ Every year</li> <li>c. Every 2 years</li> <li>d. Rarely</li> <li>e. Never</li> </ul>                                                                                                                                                                                                                                                       |
| <p>21. What is your latest T2* level?</p> <ul style="list-style-type: none"> <li>a. Under 6ms</li> <li>b. 6-10ms</li> <li>c. 10-20ms</li> <li>d. Over 20ms</li> </ul>                                                                                                                                                                                                                                                                                                         |
| <p>22. How is your liver iron measured?</p> <ul style="list-style-type: none"> <li>a. Liver biopsy</li> <li>b. MRI</li> <li>c. Not measured at all</li> </ul>                                                                                                                                                                                                                                                                                                                 |
| <p>23. What is your latest Liver Iron Concentration?</p> <ul style="list-style-type: none"> <li>a. Less than 7 mg/kg of dry weight</li> <li>b. 7-15 mg/kg of dry weight</li> <li>c. Above 15 mg/kg of dry weight</li> </ul>                                                                                                                                                                                                                                                   |

|                                                                                                                                                                                                                                                                                                                                                                                             |
|---------------------------------------------------------------------------------------------------------------------------------------------------------------------------------------------------------------------------------------------------------------------------------------------------------------------------------------------------------------------------------------------|
| <ul style="list-style-type: none"> <li>d. I am not sure</li> <li>e. I don't know</li> </ul>                                                                                                                                                                                                                                                                                                 |
| <p>24. If paying out of pocket, which services are you paying for? (Tick all that apply)</p> <ul style="list-style-type: none"> <li>a. Transfusion</li> <li>b. Chelation pumps</li> <li>c. Chelation drugs</li> <li>d. Lab tests</li> <li>e. MRI</li> <li>f. Hospitalisation</li> <li>g. Multidisciplinary Care*</li> </ul>                                                                 |
| <p>*Multidisciplinary team care is comprised of at least one patient and multiple health professionals from several different disciplines such as cardiologists, hepatologists, and endocrinologists. Health professionals who participate in a multidisciplinary team, care, collaborate and communicate together in order to address as many aspects of a patient's care as possible.</p> |
| <p>25. Who pays for your treatment? (Tick all that apply)</p> <ul style="list-style-type: none"> <li>a. Myself/ my family</li> <li>b. Health insurance (private): mine</li> <li>c. Health insurance (private): my employer's</li> <li>d. State-provided free healthcare</li> <li>e. State-provided, partly free</li> <li>f. Other</li> </ul>                                                |
| <p>26. What specialist(s) do you visit, in addition to your main treating doctor?</p> <ul style="list-style-type: none"> <li>a. Heart specialist</li> <li>b. Endocrinologist</li> <li>c. Diabetologist (if separate from endocrinologist)</li> <li>d. Psychologist</li> <li>e. Liver specialist</li> <li>f. Nephrologist</li> </ul>                                                         |
| <p>27. Where are you transfused?</p> <ul style="list-style-type: none"> <li>a. Haematology ward</li> <li>b. Children's ward</li> <li>c. Transfusion centres</li> <li>d. Other</li> </ul>                                                                                                                                                                                                    |
| <p>28. Are you satisfied with the quality and type of services you are receiving?</p> <ul style="list-style-type: none"> <li>a. Very unsatisfied</li> <li>b. Unsatisfied</li> <li>c. Neutral</li> <li>d. Satisfied</li> <li>e. Very satisfied</li> </ul>                                                                                                                                    |
| <p>29. How would you rate access to your treatment?</p> <ul style="list-style-type: none"> <li>a. Very difficult</li> <li>b. Difficult</li> <li>c. Neutral</li> <li>d. Easy</li> <li>e. Very easy</li> </ul>                                                                                                                                                                                |

|                                                                                                                                                                                                                                                                                                            |
|------------------------------------------------------------------------------------------------------------------------------------------------------------------------------------------------------------------------------------------------------------------------------------------------------------|
| <p>30. If your answer to Question 29 was "Very difficult" or "Difficult" please indicate why:</p> <ul style="list-style-type: none"> <li>a. High cost of travel to treating center</li> <li>b. High cost of treatment</li> <li>c. High cost of both travel to the treating centre and treatment</li> </ul> |
| <p>31. How many days per year do you lose from education or work because of having to attend treatment for thalassaemia?</p> <ul style="list-style-type: none"> <li>a. None</li> <li>b. 1-5 days</li> <li>c. 6-10 days</li> <li>d. 11-15 days</li> <li>e. 16 or more days</li> </ul>                       |
| <p>Thank you very much for your input!</p>                                                                                                                                                                                                                                                                 |
| <p>Your answers matter a lot to the Thalassaemia International Federation (TIF) and will help us in developing and promoting services in your country to improve the quality of your treatment.</p>                                                                                                        |
| <p>Online Survey Privacy Statement: This survey is published and managed by the Thalassaemia International Federation (TIF) in collaboration with the Open University of Cyprus. Please be aware that we take your concerns about privacy seriously and we make every reasonable effort to respect it.</p> |
| <p>We respect your trust and protect your privacy, and therefore will never sell or share this data with any third parties. The data is securely stored and only accessible by authorized personnel.</p>                                                                                                   |

### Section S3:

In Section S3 we describe the different languages to which the survey tool (anonymous questionnaire) was translated and distributed to the countries along with the method of distribution.

| Languages of questionnaire distributed in different countries |         |                                                                                                                                                                                                                                                                                                                |
|---------------------------------------------------------------|---------|----------------------------------------------------------------------------------------------------------------------------------------------------------------------------------------------------------------------------------------------------------------------------------------------------------------|
| Language                                                      | Country | Survey Approach                                                                                                                                                                                                                                                                                                |
| Albanian                                                      | Albania | TIF approached 1 patient and 1 healthcare professional to disseminate the questionnaire.                                                                                                                                                                                                                       |
| Arabic                                                        | Egypt   | TIF approached 1 caregiver and active member of a local patient organisation to act as a coordinator for the Eastern Mediterranean Region (EMR). The coordinator was trained and guided by TIF. Further to the coordinator, TIF also approached one local patient association for dissemination of the survey. |

|                 |                      |                                                                                                                                                                                                                                                                                  |
|-----------------|----------------------|----------------------------------------------------------------------------------------------------------------------------------------------------------------------------------------------------------------------------------------------------------------------------------|
|                 | Iraq                 | TIF approached 1 patient and 1 local patient association for dissemination.                                                                                                                                                                                                      |
|                 | Jordan               | TIF approached 1 patient and 1 local association for dissemination.                                                                                                                                                                                                              |
|                 | Kuwait               | TIF approached 2 patients for dissemination.                                                                                                                                                                                                                                     |
|                 | Lebanon              | TIF approached 1 patient, 1 reference centre and 1 healthcare professional for dissemination.                                                                                                                                                                                    |
|                 | Morocco              | TIF approached 1 local association for dissemination.                                                                                                                                                                                                                            |
|                 | Palestine            | TIF approached 1 local association and 1 healthcare professional for dissemination.                                                                                                                                                                                              |
|                 | Saudi Arabia         | TIF approached 1 patient and 2 local patient associations for dissemination.                                                                                                                                                                                                     |
|                 | Tunisia              | TIF approached 1 patient and 1 local patient association for dissemination.                                                                                                                                                                                                      |
|                 | United Arab Emirates | TIF approached 1 patient and 1 local patient association for dissemination.                                                                                                                                                                                                      |
| Bengali         | Bangladesh           | TIF approached 1 patient and 2 local patient associations for dissemination.<br>The patient association collected 300 questionnaires.                                                                                                                                            |
| Chinese         | China                | TIF approached 1 local patient association for dissemination.                                                                                                                                                                                                                    |
| English         | ALL                  | TIF created a dedicated website, which hosted links to all survey languages, including English. Regular posts on social media were also made to create awareness of the survey. All points of contact received the survey in English and their local language, where applicable. |
|                 | Bulgaria             | TIF approached 1 patient, 1 local patient association and 1 healthcare professional for dissemination.                                                                                                                                                                           |
|                 | Romania              | TIF approached 1 patient and 1 local patient for dissemination.                                                                                                                                                                                                                  |
| Farsi (Persian) | Iran                 | TIF approached 1 patient, 1 local patient association and 1 healthcare professional for dissemination.                                                                                                                                                                           |
| French          | France               | TIF approached 2 patients, 1 local patient association and 1 healthcare professional for dissemination.                                                                                                                                                                          |



|                   |                 |                                                                                                                                        |
|-------------------|-----------------|----------------------------------------------------------------------------------------------------------------------------------------|
|                   | Mauritius       | TIF approached 1 local patient association and 1 healthcare professional for dissemination.                                            |
| German            | Germany         | TIF approached 1 patient and 1 local patient association for dissemination. The patient was assigned as a coordinator for the country. |
| Greek             | Greece          | TIF approached 2 patients and 1 local patient association for dissemination.                                                           |
|                   | Cyprus          | TIF approached 1 patient, 1 local patient association and 1 healthcare professional for dissemination.                                 |
| Hindi             | India           | TIF approached 1 patient and 1 local patient association for dissemination.                                                            |
| Italian           | Italy           | TIF approached 1 patient, 2 local patient associations and 1 healthcare professional for dissemination.                                |
| Indonesian        | Indonesia       | TIF approached 1 local patient association for dissemination.                                                                          |
| Slavic            | North Macedonia | TIF approached 1 patient for dissemination.                                                                                            |
| Malay             | Malaysia        | TIF approached 1 patient, 1 local patient association and 1 healthcare professional for dissemination.                                 |
| Nepali            | Nepal           | TIF approached 2 patients and 1 local patient association for dissemination.                                                           |
| Sinhala           | Sri Lanka       | TIF approached 1 patient and 1 local patient association for dissemination.                                                            |
| Tagalog & Visayas | Philippines     | TIF approached 1 patient association for dissemination.                                                                                |
| Turkish           | Azerbaijan      | TIF approached 2 patients and 1 local patient association for dissemination.                                                           |
| Urdu              | Pakistan        | TIF approached 1 patient and 1 local patient association for dissemination.                                                            |
